# Supplementary material
Source: publisher site journal article supplement (https://www.kjim.org/upload/media/kjim-2021-475-suppl3.pdf)
Supplement: Supplementary file 1 [file kjim-2021-475-suppl3.pdf]

**Supplementary Table 3. MPN symptoms on quality of life (patient reported)**

| Variable                                              | MF (n = 39) | PV (n = 25) | ET (n = 41) | All (n = 105) | p value |
|-------------------------------------------------------|-------------|-------------|-------------|---------------|---------|
| MPN related symptoms reduce my quality of life        |             |             |             |               |         |
| Agree strongly                                        | 5 (12.82)   | 9 (36.00)   | 8 (19.51)   | 22 (20.95)    | 0.0004  |
| Somewhat agree                                        | 32 (82.05)  | 8 (32.00)   | 18 (43.90)  | 58 (55.24)    |         |
| Somewhat disagree                                     | 1 (2.56)    | 3 (12.00)   | 9 (21.95)   | 13 (12.38)    |         |
| Strongly disagree                                     | 0           | 3 (12.00)   | 3 (7.32)    | 6 (5.71)      |         |
| MPN is a serious health condition                     |             |             |             |               |         |
| Agree strongly                                        | 11 (28.21)  | 7 (28.00)   | 11 (26.83)  | 29 (27.62)    | 0.1086  |
| Somewhat agree                                        | 24 (61.54)  | 12 (48.00)  | 14 (34.15)  | 50 (47.62)    |         |
| Somewhat disagree                                     | 3 (7.69)    | 3 (12.00)   | 11 (26.83)  | 17 (16.19)    |         |
| Strongly disagree                                     | 0           | 1 (4.00)    | 2 (4.88)    | 3 (2.86)      |         |
| MPN may progress to a more serious condition          |             |             |             |               |         |
| Agree strongly                                        | 9 (23.08)   | 8 (32.00)   | 13 (31.71)  | 30 (28.57)    | 0.0129  |
| Somewhat agree                                        | 26 (66.67)  | 11 (44.00)  | 11 (26.83)  | 48 (45.71)    |         |
| Somewhat disagree                                     | 3 (7.69)    | 3 (12.00)   | 11 (26.83)  | 17 (16.19)    |         |
| Strongly disagree                                     | 0           | 1 (4.00)    | 3 (7.32)    | 4 (3.81)      |         |
| MPN may increase the risk of heart attacks or strokes |             |             |             |               |         |
| Agree strongly                                        | 10 (25.64)  | 9 (36.00)   | 12 (29.27)  | 31 (29.52)    | 0.4795  |
| Somewhat agree                                        | 19 (48.72)  | 9 (36.00)   | 12 (29.27)  | 40 (38.10)    |         |
| Somewhat disagree                                     | 4 (10.26)   | 4 (16.00)   | 10 (24.39)  | 18 (17.14)    |         |
| Strongly disagree                                     | 4 (10.26)   | 1 (4.00)    | 4 (9.76)    | 9 (8.57)      |         |

Values are presented as number (%).

MPN, myeloproliferative neoplasm; MF, myelofibrosis; PV, polycythemia vera; ET, essential thrombocythemia.
